1 **Bacteria evolve macroscopic multicellularity via the canalization**  
2 **of phenotypically plastic cell clustering**

3 Yashraj Chavhan<sup>1,\*</sup>, Sutirth Dey<sup>2</sup> & Peter A. Lind<sup>1,\*</sup>

4 \*Correspondence to: Yashraj Chavhan ([yashraj.chavhan@umu.se](mailto:yashraj.chavhan@umu.se)) or Peter A. Lind  
5 ([peter.lind@umu.se](mailto:peter.lind@umu.se))

6 Affiliations:

7 <sup>1</sup>Department of Molecular Biology, Umeå University, Umeå, Sweden

8 <sup>2</sup>Indian Institute of Science Education and Research (IISER) Pune, Pune, India

## 9 **Abstract**

10 The evolutionary transition from unicellular to multicellular life was a key innovation in the  
11 history of life. Given scarce fossil evidence, experimental evolution has been an important  
12 tool to study the likely first step of this transition, namely the formation of undifferentiated  
13 cellular clusters. Although multicellularity first evolved in bacteria, the extant experimental  
14 evolution literature on this subject has primarily used eukaryotes. Moreover, it focuses on  
15 mutationally driven (and not environmentally induced) phenotypes. Here we show that both  
16 Gram-negative and Gram-positive bacteria exhibit phenotypically plastic (*i.e.*,  
17 environmentally induced) cell clustering. Under high salinity, they grow as elongated ~ 2 cm  
18 long clusters (not as individual planktonic cells). However, under habitual salinity, the  
19 clusters disintegrate and grow planktonically. We used experimental evolution with  
20 *Escherichia coli* to show that such clustering can be canalized successfully: the evolved  
21 bacteria inherently grow as macroscopic multicellular clusters, even without environmental  
22 induction. Highly parallel mutations in genes linked to cell wall assembly formed the  
23 genomic basis of canalized multicellularity. While the wildtype also showed cell shape  
24 plasticity across high versus low salinity, it was either canalized or reversed after evolution.  
25 Interestingly, a single mutation could canalize multicellularity by modulating plasticity at  
26 multiple levels of organization. Taken together, we show that phenotypic plasticity can prime  
27 bacteria for evolving undifferentiated macroscopic multicellularity.

## 28 **Introduction**

29 The evolutionary shift from unicellular organisms to multicellular ones represents an  
30 important gateway towards innovation in the history of life<sup>1</sup>. This shift has conventionally  
31 been categorized as a ‘major evolutionary transition’ because it created a new level of  
32 biological organization that natural selection could act on<sup>2</sup>, which likely facilitated an  
33 unprecedented increase in biological complexity<sup>3,4</sup>. Here we focus on the evolution of the  
34 capacity to form undifferentiated cellular clusters, which was likely the first key step towards  
35 the evolution of multicellularity and has evolved independently in at least 25 distinct lineages  
36 across the tree of life<sup>1,3,5</sup>. Discerning the nuances of this evolutionary transition is inherently  
37 difficult because it occurred in deep past > 2 billion years ago. Most transitional forms have  
38 likely undergone extinction, and the scarcity of fossil evidence severely limits what can be  
39 gleaned about this transition. In the face of severely limited fossil evidence, experimental  
40 evolution has proven to be a very powerful tool in this regard as it can combine empirical  
41 rigor with diverse experimental designs to directly observe the unfolding of this transition in  
42 action<sup>6–11</sup>.

43 Most studies on the experimental evolution of multicellularity in ancestrally  
44 unicellular organisms have dealt with eukaryotes<sup>6,7,9,11–15</sup>. Unicellular fungi<sup>6,9,10</sup> and  
45 algae<sup>11,12,14</sup> have proven to be particularly useful model organisms in this context. Moreover,  
46 experimental evolution approaches for studying multicellularity have been extended to a  
47 ‘non-model’ ichthyosporean relative of animals<sup>8</sup>. Furthermore, a recent experimental  
48 evolution study has even succeeded in demonstrating the evolution of macroscopic  
49 multicellularity in yeast<sup>9</sup>. Interestingly, multicellularity has independently evolved in  
50 prokaryotes at least three different times in the history of life<sup>3,16</sup>. However, there have been  
51 very few prokaryotic experimental evolutionary studies demonstrating the *de novo* evolution of  
52 multicellularity, and these studies have been largely restricted to mat formation in

53 *Pseudomonads*<sup>17</sup>. In contrast, a rich body of work has investigated the nuances of the *already*  
54 evolved prokaryotic multicellularity<sup>18–20</sup>. Some particularly striking examples include the  
55 fruiting bodies of myxobacteria<sup>21</sup>, filamentous growth with cellular differentiation in  
56 cyanobacteria<sup>22</sup>, and the complex hyphal networks of streptomycetes<sup>23</sup>. Thus, the scarcity of  
57 prokaryotic experimental evolution studies represents a key gap in the current understanding  
58 of the evolution of multicellularity, which we aim to address here.

59 Another important aspect of most experimental evolution studies on multicellularity is  
60 their focus on mutationally derived (not environmentally induced) multicellular  
61 phenotypes<sup>8,9,13–15</sup>. These studies have revealed that the mutations required to form  
62 undifferentiated multicellular clusters are relatively easily accessible in diverse unicellular  
63 eukaryotic taxa (REFs). Moreover, a wide variety of environmental conditions can selectively  
64 enrich such *de novo* mutations (e.g., predation<sup>7,11,12</sup>, diffusible stressful agents<sup>24</sup>, improved  
65 extracellular metabolism<sup>13</sup>, etc. (reviewed in Ref. 5). Interestingly, novel phenotypes like  
66 multicellular clusters can also be expressed in the absence of mutations: phenotypic  
67 plasticity, which enables a given genotype to express different phenotypes in different  
68 environments<sup>25–27</sup>, is the basis of the facultative multicellular phenotypes exhibited by diverse  
69 taxa. For example, phytoplankton<sup>28</sup>, cyanobacteria<sup>29</sup>, and *Pseudomonads*<sup>30,31</sup> can facultatively  
70 form multicellular clusters in response to predation. Moreover, a recent study has shown that  
71 changes in environmental salinity can induce multicellular clustering in marine  
72 cyanobacteria<sup>32</sup>. Such prevalence of facultative cell clustering across diverse unicellular taxa  
73 suggests that phenotypic plasticity may be an important force in the evolution of  
74 multicellularity. This is because plasticity can facilitate biological innovation by allowing  
75 genes to be ‘followers’ in the evolution of new phenotypes<sup>33,34</sup>. Specifically, selection can act  
76 on plastic phenotypes and enrich mutations which can canalize their expression and make  
77 them constitutively expressed, even in the absence of environmental induction<sup>35–37</sup>. Indeed,

78 such canalization has been demonstrated in the unicellular alga *Chlamydomonas reinhardtii*<sup>11</sup>  
79 (also see Ref. 7), which facultatively forms microscopic clusters (palmelloids) comprising ~  
80 140 cells in the presence of rotifer predators. Becks and colleagues showed that a sustained  
81 exposure to rotifer predators for 6 months led to constitutive palmelloid development in *C.*  
82 *reinhardtii*<sup>11</sup>. However, apart from this study, no other experiment has demonstrated that  
83 phenotypic plasticity can facilitate the evolution of multicellularity. Two specific questions  
84 remain unanswered in this context: (1) Can phenotypic plasticity facilitate the evolution of  
85 *macroscopic* multicellularity (comprising large clusters with  $> 10^4$  cells)? (2) Can it do so in  
86 bacteria? Our study addresses both these questions empirically.

87       Here we show that phenotypic plasticity can facilitate the evolution of macroscopic  
88 multicellularity in bacteria by bypassing and avoiding the wait for mutational emergence of  
89 undifferentiated cluster formation. We demonstrate that phenotypically plastic cell clustering  
90 in ancestral genotypes can be rapidly canalized to efficiently form multicellular clusters even  
91 in the absence of the environmental induction. We elucidate that phenotypically plastic  
92 clustering is also manifested at the level individual cell shapes. Finally, we show that  
93 mutations in a small number of genes linked to the cell wall can canalize the ancestral  
94 phenotypic plasticity at multiple levels of organizations, ultimately leading to obligately  
95 multicellular bacterial life histories.

## 96 **Results**

### 97 **Both Gram-negative and Gram-positive bacteria exhibit phenotypically plastic cell** 98 **clustering**

99 We observed that high salinity liquid environments can make both Gram-negative and Gram-  
100 positive bacteria grow primarily as elongated macroscopic clusters and not as turbid cultures  
101 of individual planktonic cells (Fig. 1). Specifically, we grew independent clonal cultures of  
102 *Escherichia coli* (Gram-negative) and *Staphylococcus aureus* (Gram-positive) in two distinct  
103 environments (Luria Bertani broth containing either 0.5% or 6% NaCl (w/vol)) in unshaken  
104 tubes at 37°C (see *Methods*). Henceforth, we refer to these two environments as “habitual  
105 salinity” and “high salinity”, respectively. These two bacterial species have putatively  
106 diverged from their common ancestor >3000 million years ago (see *Methods*). As expected,  
107 under habitual salinity, both *E. coli* and *S. aureus* showed planktonic turbid growth without  
108 any observable clustering (Fig. 1; Supplementary movies 1 and 2). In contrast, under high  
109 salinity, both *E. coli* and *S. aureus* grew predominantly as elongated clusters and not as  
110 planktonic cultures (Fig. 1; Supplementary movies 3 and 4). In both species, the clusters  
111 comprised  $> 10^5$  viable colony forming units (CFUs) and reached 2-3 cm in length when  
112 cultured in tubes containing 5 ml nutrient medium. Such clustering was phenotypically  
113 plastic (environmentally induced): when transferred to a habitual salinity environment, the  
114 clusters disintegrated into individual cells that grew planktonically (Fig. S1). High-resolution  
115 time-lapse videos of macroscopic cluster formation revealed that in static high salinity  
116 environments, both *E. coli* and *S. aureus* showed a combination of clonal and aggregative  
117 modes of multicellular growth (Supplementary movies 2 and 4). Put differently, the  
118 multicellular growth under high salinity was a consequence of bacterial cells staying together  
119 after division (clonal expansion) *and* previously unattached cells (or cellular clusters)  
120 adhering to each other (aggregative growth).

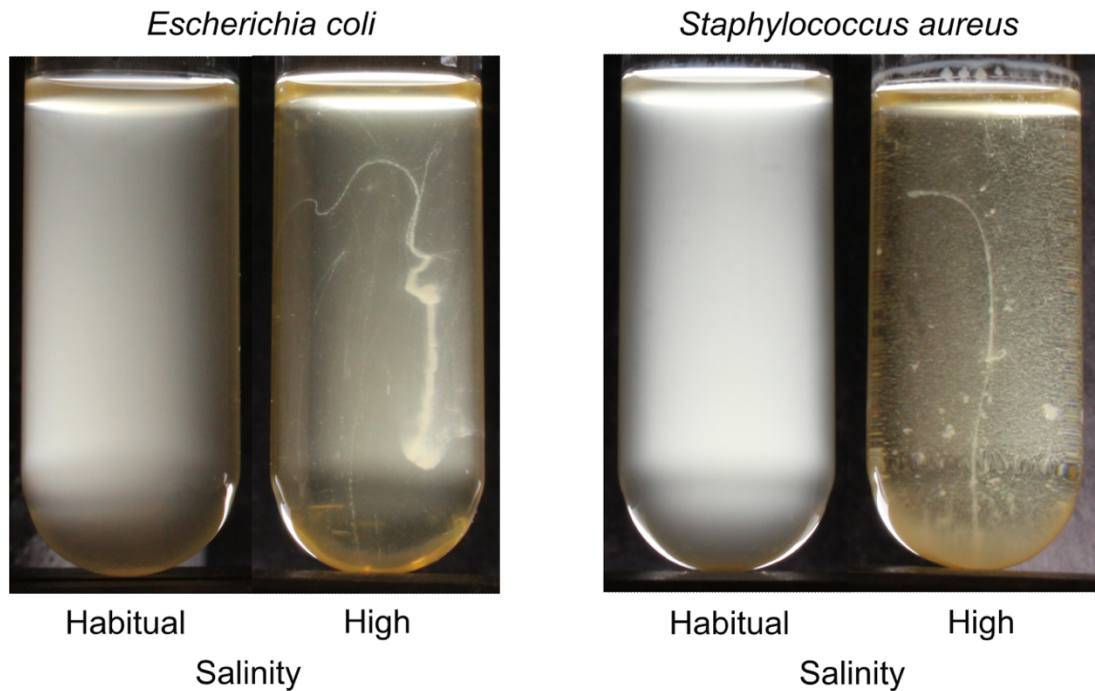

121

122 **Figure 1. Both *E. coli* (Gram negative) and *S. aureus* (Gram positive) show the capacity**  
123 **to form phenotypically plastic elongated macroscopic cell clusters.**

124

125 We further established that both *Citrobacter freundii* and *Pseudomonas aeruginosa*  
126 also exhibit such environmentally induced cell clustering suggesting that it is widespread in  
127 bacteria (Fig. S2). However, the formation of elongated clusters is not a physically inevitable  
128 outcome of bacterial growth under high salinity: the Gram-negative bacterium *Serratia*  
129 *marcescens* did not exhibit such phenotypic plasticity and grew as a turbid planktonic culture  
130 under both habitual and high salinity (Fig. S2). This led us to investigate if the phenotypically  
131 plastic bacterial clustering was itself an evolvable biological phenomenon.

132 Since the emergence of undifferentiated clusters is expected to be the first key step  
133 towards the evolution of multicellularity<sup>1,3,5</sup>, we hypothesized that phenotypically plastic cell  
134 clustering could facilitate the evolution of undifferentiated multicellularity in bacteria.

135 Focusing on *Escherichia coli*, we set out to determine if the clustering induced by high  
136 salinity can be canalized into an obligately multicellular bacterial life history, even in the  
137 absence of environmental induction.

138 **Experimental evolution of simple multicellularity via the canalization of phenotypically**  
139 **plastic cell clustering**

140 We established that *E. coli* could form phenotypically plastic macroscopic clusters not only in  
141 resting tubes but also in well-mixed environments where the culture tubes were shaken at  
142 ~180 rpm (Fig. S3). We hypothesized that resting and shaken high salinity environments  
143 should offer different selection pressures during evolution experiments: In resting cultures,  
144 oxygen supply depletes steeply from the air-liquid interface to tube's floor. Hence, selection  
145 for increased clustering in resting cultures is likely to enrich mutants that cluster  
146 preferentially at the air-liquid interface<sup>38</sup>. In contrast, such oxygen availability gradients are  
147 much weaker in shaken tubes, where selection for greater clustering may not enrich interface  
148 inhabiting mutants. Building on these ecological contrasts, we used a single *E. coli* MG1655  
149 colony to propagate two distinct experimental evolution lines (S (for Shaken) and R (for  
150 Resting)) to select for increased cell clustering in environments with progressively reducing  
151 salinity (Fig. 2a; see *Methods*). Propagating five replicate populations per line, we started the  
152 evolution experiment with media containing 6% NaCl (w/vol) and progressively reduced the  
153 salt concentration over 50 days (see *Methods*). Our selection protocol was designed to weed  
154 out planktonic bacteria growing outside clusters (Fig. 2a; see *Methods*). Unlike most other  
155 evolution experiments, here the phenotype of interest (macroscopic cluster formation) was  
156 already exhibited by the ancestor at the outset (induced by high salinity). We hypothesized  
157 that selection for clustering under progressively reduced salinity should enrich mutations that  
158 can make the clustering relatively less dependent on environmental induction. This  
159 expectation mirrors the “genes as followers” view of phenotypic evolution<sup>34</sup>. At the end of  
160 the evolution experiment, we tested if clones from the evolved populations were able to make  
161 macroscopic clusters in static habitual salinity environments (see *Methods*).



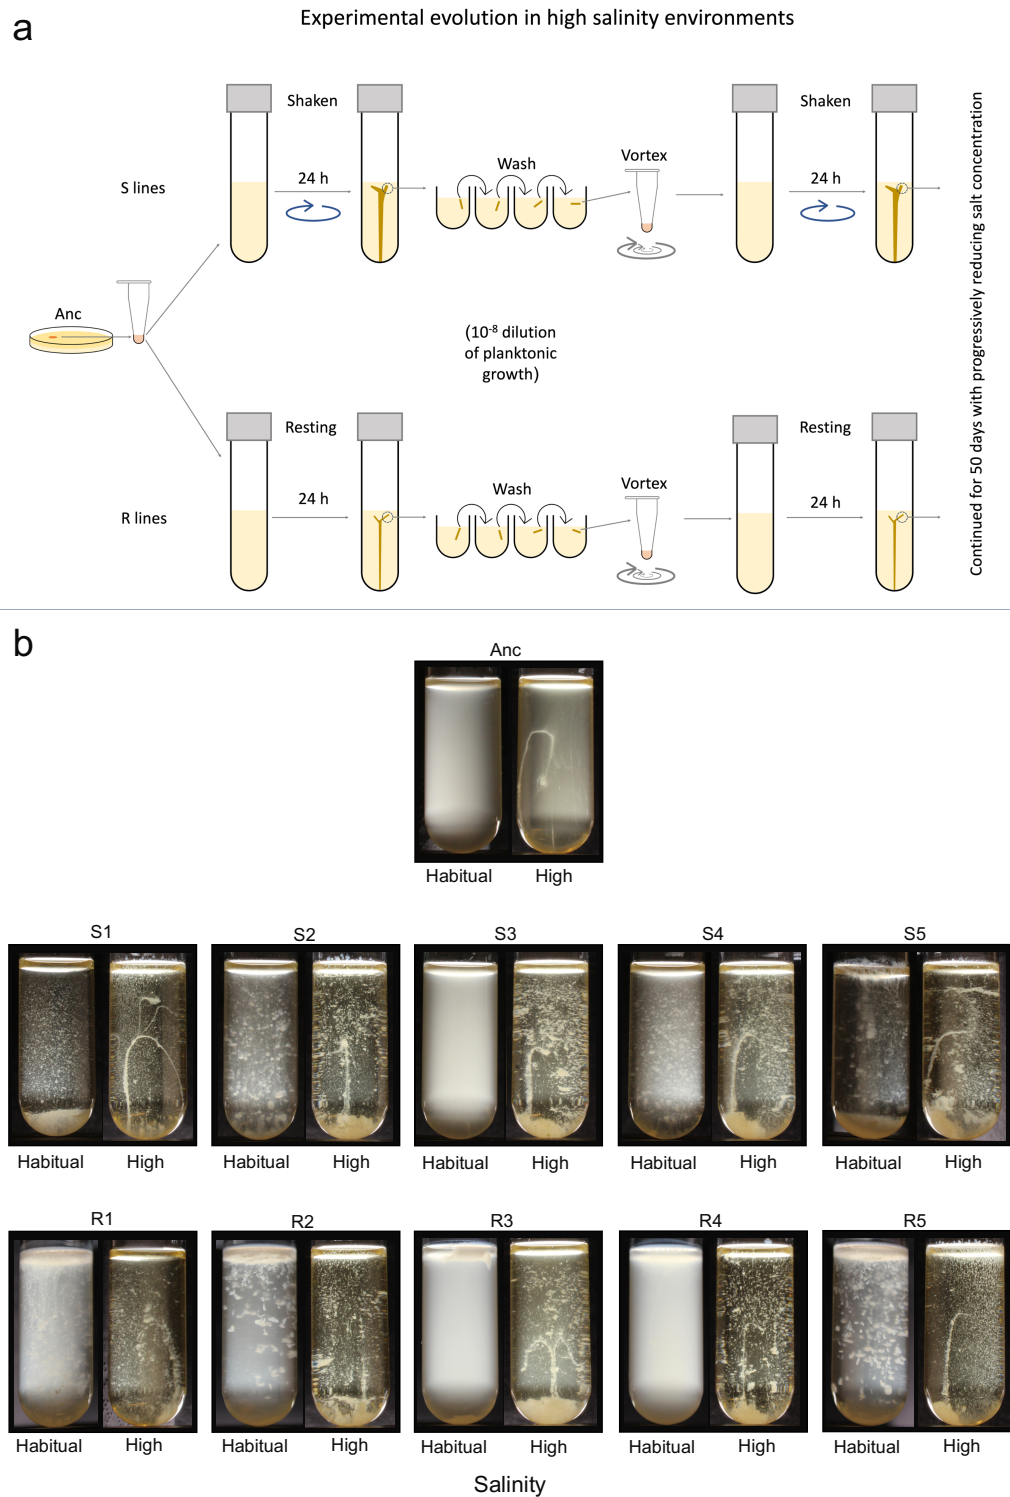

162

163 **Figure 2. Experimental evolution of macroscopic multicellularity.** (a) A schematic of our  
164 experimental evolution workflow. (b) Clonal phenotypes at the end of experimental evolution  
165 after growth under static conditions. Also see Supplementary movies 1 & 3 (for Anc), 5 & 7  
166 (for the S clones), and 6 & 8 (for the R clones). In R1-R5, the habitual salinity tubes were  
167 externally perturbed at the end of the growth cycle to disrupt mats formed at the air-liquid  
168 interface and show cell clustering (see Fig. S5 for the unperturbed tubes).

169 Our evolution experiment successfully canalized the ancestrally plastic phenotype in most of  
170 the evolved lines (Fig. 2b; Supplementary movies 5 and 6). Specifically, clones representing  
171 4 out of five S lines (S1, S2, S4, and S5) and 4 out of five R lines (R1, R2, R3, and R5) grew  
172 as macroscopic clusters even in the absence of environmental induction (Fig. 2b;  
173 Supplementary movies 5 and 6). Moreover, all five replicates of both S and R retained their  
174 ancestral ability to form elongated clusters in high salinity environments (Fig. 2b;  
175 Supplementary movies 7 and 8). Furthermore, under high salinity, both S and R showed  
176 significantly greater CFUs within their clusters as compared to the ancestor, suggesting an  
177 increase in the carrying capacity during selection (single sample t-tests against the ancestor:  $P$   
178 = 0.0181 (for S);  $P = 0.021$  (for R)); Fig. S4). Interestingly, the macroscopic clusters formed  
179 under habitual salinity were not elongated: S1, S2, S4, and S5 made a large number of  
180 macroscopic clusters that sank upon rapidly growing in size (Supplementary movie 5). The  
181 habitual salinity environment offers a weaker buoyant force than the high salinity  
182 environment; this could explain why the macroscopic clusters formed by S1, S2, S4, and S5  
183 under habitual salinity were not elongated like the clusters formed by these clones under high  
184 salinity. In contrast to the S clones, R1, R2, R3, and R5 each formed a single mat (~1 mm  
185 thick) at the air-liquid interface under habitual salinity (Fig. S5; Supplementary movie 6).  
186 Moreover, the R1, R2, and R5 mats remained intact throughout the growth phase (Fig. S5);  
187 these mats disintegrated and sank only upon external perturbation, as shown in Fig. 2b. Thus,  
188 selection for clustering without environmental induction in resting tubes indeed enriched  
189 mutants that preferentially grew at the air-liquid interface, as we had hypothesized initially.

190 Since S1, S2, S4, S5, R1, R2, R3, and R5 formed multicellular clusters even in the  
191 absence of environmental induction, we conclude that they successfully evolved the first step  
192 towards multicellularity which demands that cells *inherently* grow as clusters. Interestingly,  
193 our selection protocol made the bacterial clusters undergo an artificially imposed life cycle

194 where a small piece of the cluster in question (which was disintegrated by vigorous vertexing  
195 and then transferred into fresh media) gave rise to a new (larger) cluster. This motivated us to  
196 test if the clusters also qualify biological units that could spontaneously complete a life cycle  
197 consisting at least one multicellular stage<sup>39-41</sup>. To this end, we cultured an S clone (S5) in an  
198 arena where the bacteria could access fresh nutrients without being artificially transferred  
199 using a pipette (see *Methods*). We found that the bacteria successfully completed a life cycle  
200 where the old clusters gave rise to new clusters after accessing fresh nutrient medium, in both  
201 habitual and high salinity environments (Supplementary movie 9).

202 Taken together, the canalization of ancestrally plastic cell clustering led to the  
203 evolution of undifferentiated multicellularity in our experiments, which enabled bacteria to  
204 grow inherently as multicellular units, even in the absence of environmental induction.  
205 Having investigated phenotypic plasticity and its canalization at the level of *collectives* of  
206 cells (clusters), we turned our attention to the effects of selection on phenotypes at the level  
207 of *individual* cells.

208

### 209 **Phenotypic plasticity and its evolution at the cellular level**

210 We performed both brightfield and fluorescence microscopy on the ancestral and evolved  
211 clones to determine if and how macroscopic cluster formation corresponded to changes in the  
212 cell shape (see *Methods*). We found that *E. coli* shows stark phenotypic plasticity in cell  
213 shape between habitual and high salinity environments (Fig. 3). Specifically, whereas the  
214 ancestral genotype showed its characteristic rod shape under habitual salinity, its cells  
215 became spherical under high salinity (Fig. 3). Surprisingly, we found that all the evolved  
216 lines lost their spherical cell shape under high salinity and their cells became elongated (Fig.  
217 3). We quantitatively analyzed these cellular morphological changes using two distinct  
218 metrics (see *Methods*).

219           The ancestral genotype showed significant phenotypic plasticity in terms of the  
220 cellular perimeter observed in 2d images: specifically, the ancestor had significantly smaller  
221 cells under high salinity than under habitual salinity (Fig. 3; Table S1). In contrast, clones  
222 representing 4 out of five S lines (S1, S2, S4, and S5) and 4 out of five R lines (R1, R2, R3,  
223 and R5) showed a reversal of the ancestral phenotypic plasticity in terms of the cell perimeter  
224 (Fig. 3; Table S1). Specifically, S1, S2, S4, S5, R1, R2, R3, and R5 showed significantly  
225 larger cells under high salinity (Fig. 3; Table S1). There was a clear correspondence between  
226 reversal of the cell perimeter plasticity and successful canalization of cellular clustering: The  
227 eight lines that showed reversal in the ancestral cell perimeter plasticity were also the ones  
228 that successfully canalized the cellular clustering during experimental evolution (compare  
229 Figs. 2 and 3). On the other hand, the S3 and R4 clones showed no difference in cellular  
230 perimeters under habitual versus high salinity while also failing to successfully canalize  
231 cellular clustering (compare Figs. 2 and 3).

232           We also analyzed cellular morphology in terms of the circularity of individual cells  
233 (see *Methods*). The ancestor showed significant phenotypic plasticity in terms of cell  
234 circularity: (rod shaped cells under habitual salinity versus spherical cells under high salinity;  
235 Fig. S6; Table S2). In contrast, the cells belonging to S1, S3, R4, and R5 underwent moderate  
236 elongation that imparted the characteristic rod shape of *E. coli* under both habitual and high  
237 salinity (Fig. S6). Moreover, S1, S3, R1, R4, and R5 underwent canalisation in terms of their  
238 cellular circularity (*i.e.*, their cells exhibited similar circularity under both habitual and high  
239 salinity (Fig. S6; Table S2)). A relatively greater cellular elongation in S2, S4, S5, R2, and  
240 R3 under high salinity reversed their ancestral phenotypic plasticity in terms of cellular  
241 circularity and made them filamentous (Fig. 3; Table S1)).

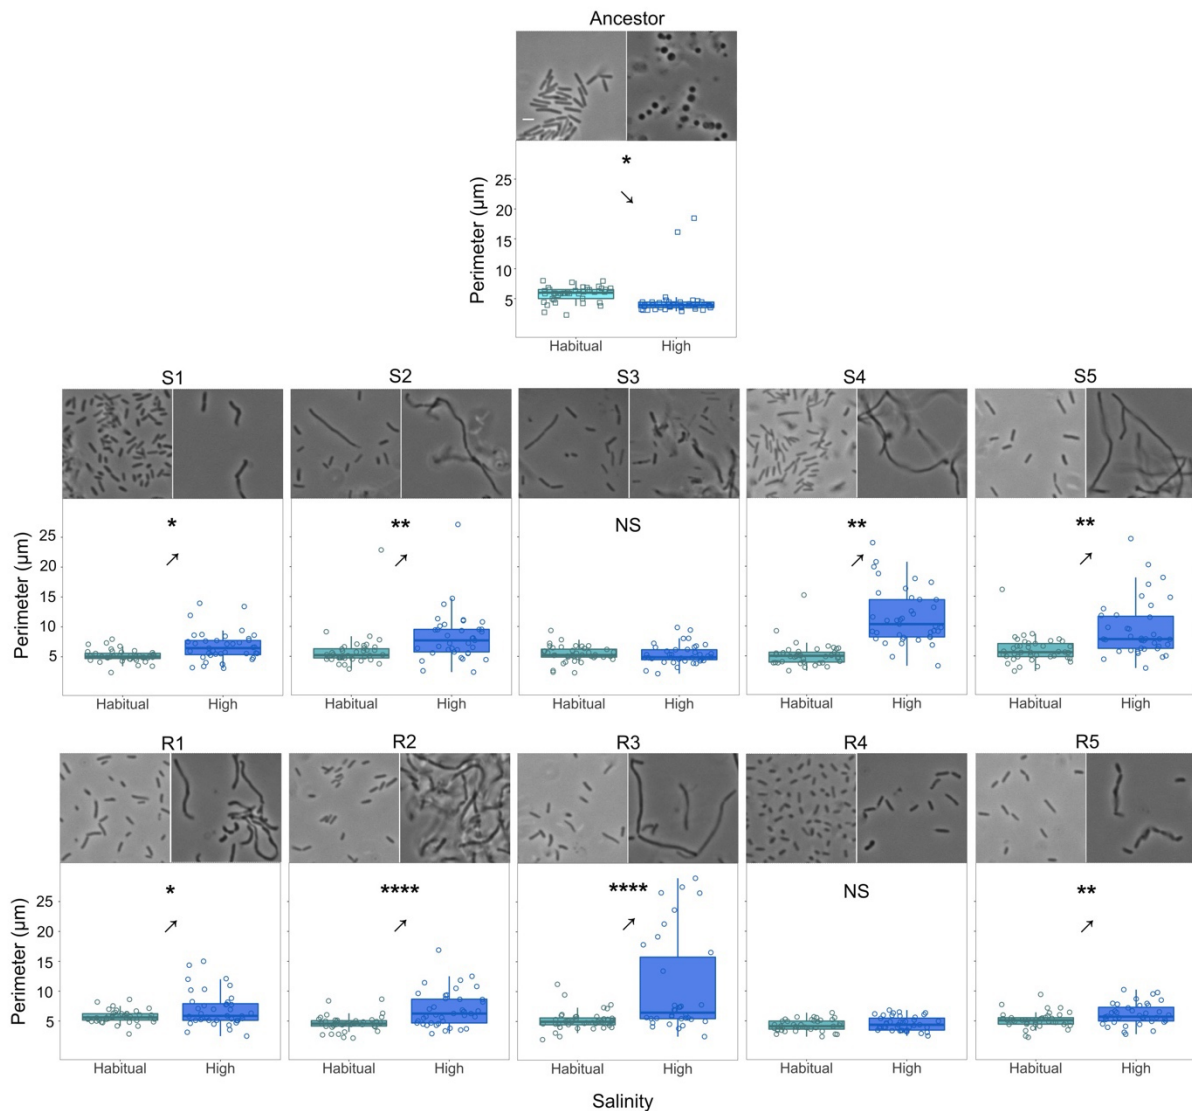

242

243 **Figure 3. The evolution of phenotypic plasticity in cellular morphology.** The arrows point  
 244 towards the qualitative direction of phenotypic plasticity. \*:  $P \leq 0.05$ ; \*\*:  $P \leq 0.01$ ; \*\*\*:  $P \leq$   
 245  $0.001$ ; \*\*\*\*:  $P \leq 0.0001$ . See Table S1 for statistical details. The reversal of the ancestral cell  
 246 perimeter plasticity (observed in eight out of 10 evolved clones) corresponded to the  
 247 canalization of phenotypically plastic cell clustering (compare with Fig. 2b). Also see Fig. S6  
 248 for cell shape plasticity quantified in terms of cellular circularity.

249

250 Having investigated phenotypic plasticity and its canalization at two distinct levels of  
 251 biological organization (selectable multicellular units vs. individual cells), we studied the  
 252 genetic basis of the evolution of undifferentiated multicellularity observed in our  
 253 experiments.

254 **The genetic basis of canalized multicellularity in *E. coli***

255 We sequenced whole genomes of all the S and R clones described in Figs. 2 and 3 and  
256 compared them to the ancestor to identify the mutations that resulted in the evolution of  
257 simple macroscopic multicellularity in our experiments (see *Methods*). We found that most  
258 mutations occurred within genes involved in the biosynthesis of peptidoglycan, which forms  
259 the bulk of eubacterial cell walls (Fig. 4a). Specifically, out of the 19 mutations putatively  
260 linked to changes in cell surface properties, 13 were found within genes directly involved in  
261 peptidoglycan biosynthesis (Table S3). We found that 7 out of the ten sequenced clones had a  
262 mutation in *MraY*, the enzyme that catalyzes the first membrane-bound step of peptidoglycan  
263 biosynthesis<sup>42</sup>. Despite such high degree of parallelism at the level of genes, we found several  
264 different mutations at widely distributed locations within the primary chain of *MraY* (Table  
265 S3). Interestingly, all these mutations were concentrated towards one side of the tertiary  
266 structure of *MraY*, facing the periplasmic zone of the transmembrane protein (Fig. 4b). These  
267 mutations, spaced apart from the cytoplasmic active site of *MraY* by the bacterial inner  
268 membrane, likely play a role in recruiting other peptidoglycan-related proteins in the  
269 periplasm. We found that all the seven clones with an *MraY* mutation successfully evolved  
270 simple macroscopic multicellularity by canalizing the ancestrally plastic cellular clustering  
271 (compare Figs. 2b and 4b). In addition to an *MraY* mutation, 6 of these seven clones also  
272 carried mutations in other genes linked to peptidoglycan synthesis, biofilm formation, or  
273 adaptation to nutrient media (Table S3). Moreover, we observed the strongest canalization of  
274 the clustering phenotype (with almost all bacterial growth within macroscopic clusters and  
275 the absence of detectable turbidity) in the S clones that carried at least one mutation in  
276 addition to an *MraY* mutation (S1, S2, and S5; see Fig. 2b and Table S2).



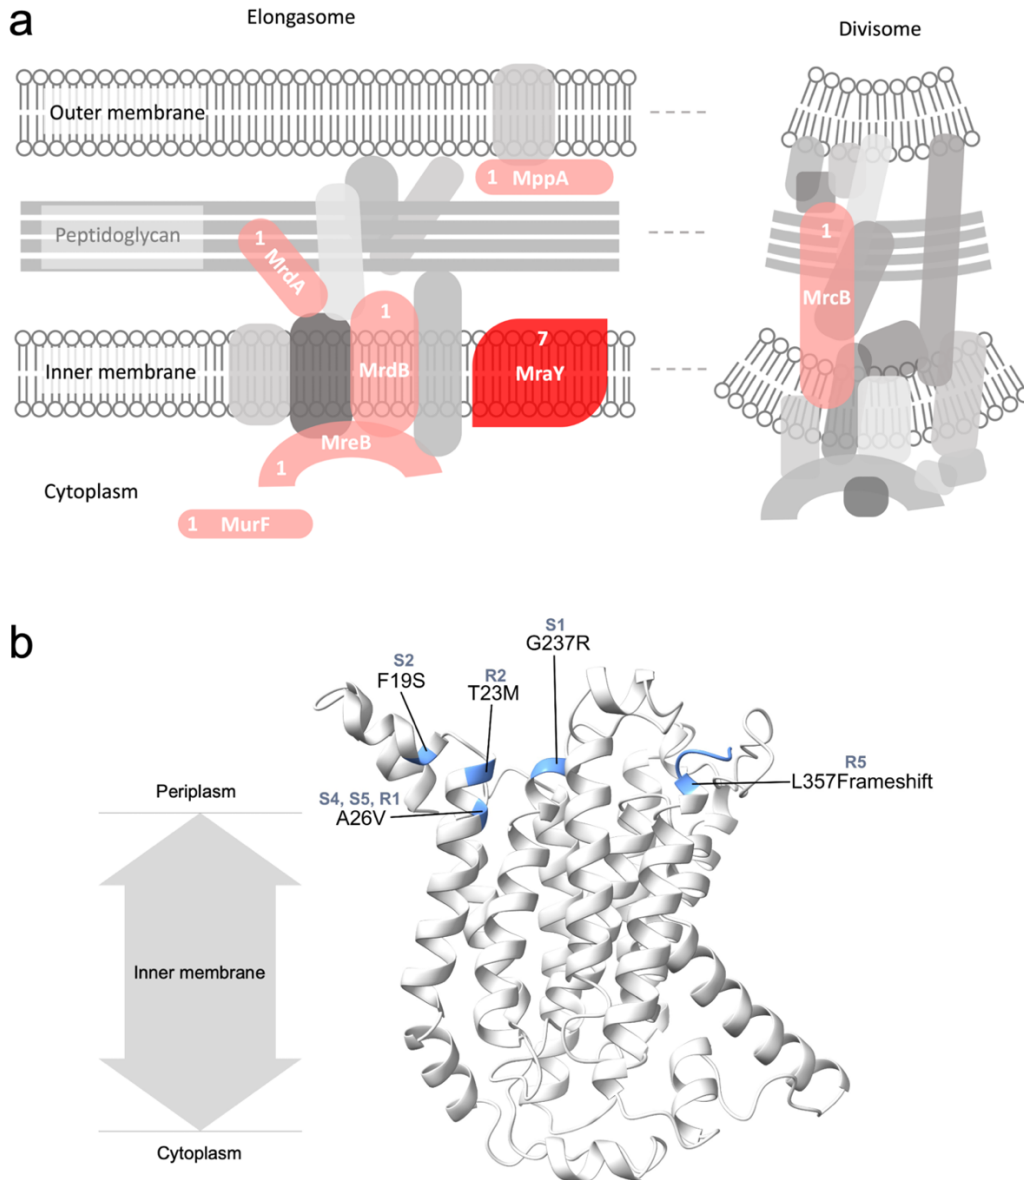

277

278 **Figure 4. The genetic basis of canalized multicellularity.** (a) Experimental evolution of  
279 canalized multicellularity primarily enriched mutations in genes involved in cell wall  
280 assembly. The schematic shows the proteins encoded by the mutated genes in red. The  
281 numbers accompanying the mutated proteins represent the number of clones that showed a  
282 mutation in a particular protein. Two genes (*murF* and *mppA*) showed synonymous  
283 mutations. (b) The location of mutations on the 3D structure of MraY, the protein that  
284 mutated in 70% of the sequenced clones. All the mutated regions are located near the  
285 periplasmic region of the transmembrane protein.  
286 Curiously, S4 was only one MraY mutation away from the common ancestor (Table S3),  
287 which suggests that a single mutation can be sufficient for canalizing the ancestrally plastic

288 cell clustering. It is worth noting that such canalization driven by a single mutation was  
289 relatively weak: the S4 clone showed a combination of macroscopic clusters and planktonic  
290 growth under habitual salinity (Fig. 2b). Furthermore, R3, the only clone that evolved a  
291 multicellular life history without enriching an *MraY* mutation, also displayed a weak  
292 canalization characterized by a combination of both clustering and turbid growth (Fig. 2b).

293 Unlike the S clones, the R clones preferentially colonized the air-liquid interface  
294 (Supplementary movies 5-8). We found that the mutations in the R clones could potentially  
295 explain this phenotypic difference. Specifically, R5 had two mutations in genes putatively  
296 linked to mat formation at the air-liquid interface through c-di-GMP signaling (*dgcQ* and  
297 *pdeA* (Table S3)). Moreover, R2, R3, and R4 had mutations within (or upstream to) genes  
298 with possible links to biofilm formation (*mprA* encoding a transcriptional repressor (R2, R3,  
299 and R4) and *bhsA* encoding an outer membrane protein (R4); Table S3). Furthermore, none  
300 of the S clones showed a mutation in any of these four genes linked to interface inhabiting  
301 mat formation (*dgcQ*, *pdeA*, *mprA*, or *bhsA*). Such mutational contrast could potentially  
302 explain the differences in the abilities of the S and R clones to inhabit the air-liquid interface.

303 Several other genes linked to peptidoglycan biosynthesis which mutated in our study  
304 (*mrcB*, *mrda*, *mrdb*, *mreB*, *murF*; Fig. 4a) are linked to the maintenance of cell shape in *E.*  
305 *coli*<sup>43-45</sup>. Specifically, both MrdA and MrdB are known to play key roles in maintaining the  
306 characteristic rod shape of *E. coli*<sup>43,44</sup>. Moreover, MreB, which is the bacterial analogue of  
307 actin, is an essential protein that forms a scaffold which interacts with several other  
308 peptidoglycan biosynthesis proteins and plays key role in cellular elongation<sup>42</sup>. Finally, *MraY*  
309 has been shown to affect both the cell shape and adhesion in the multicellular cyanobacterium  
310 *Anabaena*<sup>46</sup>. This suggests that the mutations observed in the clones that successfully  
311 canalized multicellular clustering can also be linked to the evolutionary changes in cell shape  
312 plasticity (Fig. 3; Table S3).



## 313 **Discussion**

314 Our study begins with the demonstration that bacteria show phenotypically plastic cell  
315 clustering that results in large macroscopic structures in high salinity environments. Since  
316 both Gram-negative and Gram-positive bacteria exhibit this phenomenon (Fig. 1), such  
317 plastic development of multicellular clusters appears to be a common (but not universal)  
318 bacterial capacity. Interestingly, the trigger for such phenotypically plastic cell clustering  
319 (high salinity) is frequently encountered by bacteria in diverse environments ranging from  
320 marine habitats to human skin. Therefore, such clustering is expected to have important  
321 ecological implications. We further showed that this plastic capacity to form multicellular  
322 clusters is evolvable and can be canalized rapidly to result in bacteria that obligately grow as  
323 multicellular clusters.

324 Our study is unique because it demonstrates not only that phenotypic plasticity can  
325 facilitate the evolution of macroscopic multicellularity, but also that it can do so in unicellular  
326 bacteria. Specifically, although previous studies have shown that the canalization of  
327 phenotypic plasticity can lead to multicellular development<sup>11,31,47</sup>, their multicellular  
328 structures contained < 200 cells and remained microscopic. Moreover, a recent important  
329 study has demonstrated the mutation-driven (*i.e.*, not plasticity-based) evolution of  
330 macroscopic multicellularity in a eukaryote (yeast), where the largest multicellular clusters  
331 comprised  $\sim 4.5 \times 10^5$  cells<sup>9</sup>. Building on this fascinating finding, we show that phenotypic  
332 plasticity can enable unicellular *bacteria* to form macroscopic clusters comprising  $> 10^5$   
333 CFUs under high salinity. Furthermore, we successfully canalized this plastic phenotype to  
334 form macroscopic clusters comprising  $> 10^4$  CFUs without any environmental induction. We  
335 also note that our CFU counts within clusters are likely underestimates (*see Methods*).  
336 Furthermore, since the evolved bacteria grow obligately as macroscopic multicellular clusters  
337 even in the absence environmental induction, we conclude that they have successfully

338 evolved the first step towards the multicellularity that requires the obligate formation of  
339 undifferentiated clusters. Importantly, such obligately multicellular growth of our evolved  
340 bacteria is distinct from the facultative formation of largely planar biofilms (with limited  
341 vertical growth) upon attachment to substrate surfaces, as shown by diverse bacterial  
342 species<sup>48</sup>.

343         The evolution of multicellularity is considered to be one of the most frequent ‘major  
344 transitions’ because a large diversity of ecological conditions can make multicellularity  
345 selectively favorable<sup>5,49</sup>. Corroborating this notion, our results suggest that owing to  
346 phenotypically plasticity, the ability to evolve multicellularity should be widespread among  
347 bacteria, which comprise a rather large part of the tree of life. Crucially, plastic clustering  
348 enables bacteria to avoid waiting for the selection of specific *de novo* mutations that make  
349 cells stay together. Instead, environmental changes (*e.g.*, an increase in salinity) can rapidly  
350 lead to the development of multicellular phenotypes, which could then be subjected to  
351 selection. By demonstrating this ‘genes as followers’ mode of evolution<sup>34</sup>, our study also  
352 highlights the role of plasticity in a major evolutionary transition. Although most studies  
353 dealing with phenotypic plasticity tend to investigate one plastic trait<sup>50</sup>, some studies have led  
354 to powerful insights by simultaneously investigating plasticity in multiple traits, all of which  
355 belong to the same level of biological organization<sup>51–53</sup>. Our study makes a significant  
356 advance in this field by investigating phenotypic plasticity and its canalization at two  
357 different levels of biological organization (*collectives* of cells (Fig. 2b) and *individual* cells  
358 (Fig. 3)). An important aspect of our experiment is that it demonstrates the simultaneous  
359 evolution of plasticity in opposite directions at different levels of organization (compare Figs  
360 2b and 3). Specifically, at the level of cell collectives, most of the evolved lines formed  
361 multicellular clusters under both habitual and high salinity; this phenotype was ancestrally  
362 expressed *in the presence of environmental induction* (Fig. 2b). In contrast, at the level of

363 individual cells, the evolved lines showed non-spherical cell shapes with an average  
364 circularity of  $\leq 0.667$  under both low and high salinity; the ancestor expressed such cell  
365 circularity *in the absence of environmental induction* (Fig. 3). Taken together, these  
366 observations caution against forecasting an evolutionary change in phenotypes by  
367 extrapolating from the phenotypic plasticity shown by the ancestor.

368         Although both spherical and rod-shaped cells can form multicellular clusters under  
369 high salinity, our selection for greater clustering under progressively reducing environmental  
370 induction ended up selecting for elongated bacterial cells (Fig. 3). Moreover, we found that  
371 all the six clones that showed highly elongated (filamentous) cells under high salinity (S2, S4,  
372 S5, R1, R2, and R3) also exhibited efficient canalization of the multicellular clustering (Fig.  
373 2b). On the other hand, the two clones which could not canalize multicellular clustering  
374 successfully (S3 and R4) also lacked highly elongated cells under high salinity (Fig. 3). Thus,  
375 cellular elongation under high salinity closely corresponded with the canalization of the  
376 ancestrally plastic cell clustering. This notion aligns with two recent eukaryotic studies which  
377 argue that greater cell elongation leads to more efficient packing within clusters<sup>9,54</sup>. It may  
378 also explain why the canalization of multicellularity was based on mutations predominantly  
379 in cell shape modulating peptidoglycan biosynthesis loci (Fig. 4). The highly parallel  
380 molecular evolution we observed at the level of loci points towards a putative pleiotropy  
381 between cell shape and clustering. This notion is strengthened by our observation that in  
382 clone S4, a single *MraY* mutation could not only canalize the ancestrally plastic cell  
383 clustering but also give rise to highly elongated cells (Figs. 2b and 3). Moreover, despite  
384 superficially resembling *Pseudomonas fluorescens* mats formed under static conditions, the  
385 mats formed by R1, R2, R3, and R5 under optimal salinity were genotypically different:  
386 Unlike *P. fluorescens* mats that are predominantly formed by mutants overproducing cyclic-  
387 di-GMP<sup>55</sup>, all our *E. coli* clusters were primarily caused by mutations in peptidoglycan

388 biosynthesis genes (Figs. 2 and 4). Interestingly, in addition to an MraY mutation (linked to  
389 peptidoglycan biosynthesis), R5 also contained two mutations linked to cyclic-di-GMP  
390 expression (Table S3).

391         Apart from adding multiple key insights to the current understanding of how  
392 multicellularity evolves, our results should also act as stepping-stones for new theoretical and  
393 empirical studies in several diverse fields of inquiry (Fig. S8). For example, why bacteria  
394 tend to form a single columnar cluster under high salinity instead of multiple globular clusters  
395 is a fascinating biophysical puzzle. Moreover, a generic tendency to form environmentally  
396 induced clusters could significantly impact the ecological interactions between multiple  
397 different bacterial species, potentially facilitating long-term co-existence by providing  
398 spatially segregated growth. Furthermore, the cells at the cluster's periphery inevitably face a  
399 different environment as compared to those at the core. Hence, an exciting new line of work  
400 would be to test if such ecological differences can drive the evolution of cellular  
401 differentiation. Finally, by demonstrating that bacteria can rapidly evolve macroscopic  
402 multicellularity, our results call for a reconsideration of why multicellular organisms are  
403 predominantly eukaryotic.

## 404 **Methods**

### 405 **Bacterial strains and nutrient media**

406 We used the following bacteria for studying the phenotypic plasticity of cell clustering:

407 *Escherichia coli* K12 substr. MG1655 (Eco galK::cat-J23101-dTomato); *Staphylococcus*

408 *aureus* JE2; *Pseudomonas aeruginosa* PAO1; *Citrobacter freundii* ATCC 8090; *Serratia*

409 *marcescens* BS 303. The bacteria were cultured in liquid environments containing Luria

410 Bertani broth (10 g/L tryptone, 5 g/L yeast extract) with 5 g/L NaCl (habitual salinity) or 60

411 g/L NaCl (high salinity).

### 412 **Timelapse movies**

413 We used Canon Rebel T3i (Canon Inc. (Ōta, Tokyo, Japan)) to capture macroscopic images

414 and then stitched them into timelapse movies using Persecond for Mac version 1.5 (Flixel

415 Inc. (Toronto, Canada)). For all the timelapses reported in our study, we used a remote

416 control to automatically capture an image every 4 minutes and published the movie files at 16

417 fps.

### 418 **Experimental evolution**

419 We conducted experimental evolution with bacterial populations derived clonally from a

420 single *E. coli* MG1655. We propagated five independent replicate populations each belonging

421 to two distinct selection lines (S (for Shaken (at ~180 rpm)) and R (for Resting)) by culturing

422 bacteria in glass tubes containing 5 ml LB (Fig. 2a). In the beginning of the evolution

423 experiment, the bacteria were cultured in Luria Bertani broth supplemented with 6% NaCl

424 (w/vol). The NaCl concentration in the nutrient medium was progressively reduced over 50

425 days during the experiment (6% w/vol (days 1-11), 5% w/vol (days 12-15), 4% w/vol (days

426 16-19); and 3% w/vol (days 20-50)). We subcultured bacteria into fresh nutrient medium

427 every 24 h using a selection protocol designed to enrich cell clustering phenotypes in the face  
428 of progressively reducing environmental induction. For each subculture, we picked a small  
429 piece of the previous day's bacterial cluster fitting within 20  $\mu$ l and washed it serially in 2 ml  
430 fresh media in four distinct wells. This diluted the planktonically growing bacteria by  $10^8$ -  
431 fold while keeping the clustered bacteria undiluted. We stored periodic cryo-stocks for all the  
432 10 independently evolving populations. We streaked the endpoint cryo-stocks on Luria agar  
433 without any externally supplemented NaCl and isolated a colony from each population after  
434 18 hours. We used these colonies (clones S1, S2, S3, S4, S5, R1, R2, R3, R4, and R5) to  
435 conduct growth assays and genomic sequencing.

#### 436 **Microscopy and cell shape analysis**

437 We performed both brightfield and fluorescence microscopy with clonal ancestral and  
438 evolved samples at 100x magnification (oil immersion) using Nikon Eclipse 90i (Nikon Inc.  
439 (Amstelveen, NL)). All the samples subjected to microscopy were streaked on fresh Luria  
440 agar from their respective cryo-stocks. A single colony was then used to inoculate the liquid  
441 media in question (high versus habitual salinity) to obtain the phenotype at the level of cell  
442 collectives. 5  $\mu$ l samples from fully grown liquid cultures (containing planktonic cells and/or  
443 macroscopic clusters) were spotted on a glass slide and protected with a glass coverslip,  
444 which resulted in the flattening and disintegration of the clusters. We used the Texas Red  
445 optical filter (excitation: 562/40 nm; emission: 624/40 nm) to observe cells expressing  
446 dTomato. Overlays between brightfield and fluorescent images were used to identify cell  
447 shapes and boundaries. We used the open-source software FIJI (ImageJ 1.53) for Mac to  
448 analyze cell shapes by manually tracing the cellular boundaries. We computed cellular  
449 perimeter and circularity ( $= 4\pi \times \frac{area}{perimeter^2}$ ) using built-in functions in FIJI.

450

451 **Statistics**

452 *Cell shape plasticity*: We used two-tailed *t*-tests (unequal variance across types) to analyze  
453 the difference between cell shape parameters for a given genotype across habitual versus high  
454 salinity (N = 40 cells). The two cell shape parameters (perimeter and circularity) were  
455 analyzed separately.

456 *CFU counts*: We used single simple *t*-tests to compare the CFU counts of the evolved clones  
457 against the ancestral level, both under high and habitual salinity (N = 5 distinct clones each  
458 for S (S1, S2, S3, S4, and S5) and R (R1, R2, R3, R4, and R5)).

459 **Whole genome sequencing**

460 Genomic DNA from single colonies from each population was isolated using GeneJet  
461 Genomic DNA Purification kit (Thermo Scientific™) for whole genome sequencing on the  
462 evolved clones and the ancestor. We used a standard miniaturized protocol to prepare DNA  
463 libraries using the NEBNext Ultra II FS DNA Library Prep Kit for Illumina (New England  
464 BioLabs Inc. (Ipswich, MA, USA))<sup>56</sup>. The quantity of the prepared DNA libraries was  
465 validated with a Qubit© 2.0 Fluorometer (Thermo Fisher Scientific Inc. (Waltham, MA,  
466 USA)). We used the MiSeq system (Illumina Inc. San Diego, CA, USA) to perform 250-bp  
467 paired end next generation sequencing on the prepared libraries at a minimum coverage of  
468 10x (the average coverage of the detected mutations was 43.80x). We analyzed the  
469 sequencing output using the Geneious Prime software for Mac (v2022.0.2) and trimmed the  
470 sequencing output data using BBDuk to remove reads < 20 bp or with a quality score < 20.  
471 Since we conducted sequencing on clones, to avoid interpreting sequencing errors as  
472 mutations, we restricted our analysis to variants with frequencies  $\geq 70\%$ .

473

474

475 **Locating mutations on 3D protein structures**

476 Since the crystal structure of MraY is not yet known for *E. coli*, a publicly available  
477 homology model made by AlphaFold v2.0<sup>57</sup> was used (accession P0A6W3). We used the  
478 UCSF ChimeraX software<sup>58</sup> for Mac (<https://www.rbvi.ucsf.edu/chimerax/>) to identify and  
479 highlight the locations of the sites mutated in MraY in our experiment. The highlighted  
480 output was used to make Fig. 4b.



## References

- 481 1. Maynard Smith, J. & Szathmáry, E. *The major transitions in evolution*. (W.H. Freeman,  
482 1995).
- 483 2. Michod, R. E. *Darwinian dynamics: evolutionary transitions in fitness and individuality*.  
484 (Princeton University Press, 1999).
- 485 3. Bonner, J. T. The origins of multicellularity. *Integrative Biology: Issues, News, and*  
486 *Reviews* **1**, 27–36 (1998).
- 487 4. Grosberg, R. K. & Strathmann, R. R. The evolution of multicellularity: a minor major  
488 transition? *Annu. Rev. Ecol. Evol. Syst.* **38**, 621–654 (2007).
- 489 5. Tong, K., Bozdag, G. O. & Ratcliff, W. C. Selective drivers of simple multicellularity.  
490 *Current Opinion in Microbiology* **67**, 102141 (2022).
- 491 6. Ratcliff, W. C., Denison, R. F., Borrello, M. & Travisano, M. Experimental evolution of  
492 multicellularity. *PNAS* **109**, 1595–1600 (2012).
- 493 7. Herron, M. D. *et al.* De novo origins of multicellularity in response to predation. *Sci Rep*  
494 **9**, 2328 (2019).
- 495 8. Dudin, O., Wielgoss, S., New, A. M. & Ruiz-Trillo, I. Regulation of sedimentation rate  
496 shapes the evolution of multicellularity in a close unicellular relative of animals. *PLOS*  
497 *Biology* **20**, e3001551 (2022).
- 498 9. Bozdag, G. O. *et al.* De novo evolution of macroscopic multicellularity.  
499 2021.08.03.454982 Preprint at <https://doi.org/10.1101/2021.08.03.454982> (2021).
- 500 10. Driscoll, W. W. & Travisano, M. Synergistic cooperation promotes multicellular  
501 performance and unicellular free-rider persistence. *Nature Communications* **8**, 15707  
502 (2017).

- 503 11. Becks, L., Ellner, S. P., Jones, L. E. & Jr, N. G. H. Reduction of adaptive genetic  
504 diversity radically alters eco-evolutionary community dynamics. *Ecology Letters* **13**,  
505 989–997 (2010).
- 506 12. Boraas, M. E., Seale, D. B. & Boxhorn, J. E. Phagotrophy by a flagellate selects for  
507 colonial prey: A possible origin of multicellularity. *Evolutionary Ecology* **12**, 153–164  
508 (1998).
- 509 13. Koschwanez, J. H., Foster, K. R. & Murray, A. W. Sucrose Utilization in Budding Yeast  
510 as a Model for the Origin of Undifferentiated Multicellularity. *PLOS Biology* **9**,  
511 e1001122 (2011).
- 512 14. Ratcliff, W. C. *et al.* Experimental evolution of an alternating uni- and multicellular life  
513 cycle in *Chlamydomonas reinhardtii*. *Nat Commun* **4**, 2742 (2013).
- 514 15. *The Evolution of Multicellularity*. (CRC Press, 2022). doi:10.1201/9780429351907.
- 515 16. Bonner, J. T. *First signals: the evolution of multicellular development*. (Princeton  
516 University Press, 2000).
- 517 17. Hammerschmidt, K., Rose, C. J., Kerr, B. & Rainey, P. B. Life cycles, fitness decoupling  
518 and the evolution of multicellularity. *Nature* **515**, 75–79 (2014).
- 519 18. Claessen, D., Rozen, D. E., Kuipers, O. P., Søgaard-Andersen, L. & van Wezel, G. P.  
520 Bacterial solutions to multicellularity: a tale of biofilms, filaments and fruiting bodies.  
521 *Nat Rev Microbiol* **12**, 115–124 (2014).
- 522 19. Geerlings, N. M. J. *et al.* Division of labor and growth during electrical cooperation in  
523 multicellular cable bacteria. *Proceedings of the National Academy of Sciences* **117**,  
524 5478–5485 (2020).
- 525 20. Schwartzman, J. A. *et al.* Bacterial growth in multicellular aggregates leads to the  
526 emergence of complex life cycles. *Current Biology* **0**, (2022).

- 527 21. Velicer, G. J. & Vos, M. Sociobiology of the myxobacteria. *Annu Rev Microbiol* **63**, 599–  
528 623 (2009).
- 529 22. Herrero, A., Stavans, J. & Flores, E. The multicellular nature of filamentous heterocyst-  
530 forming cyanobacteria. *FEMS Microbiology Reviews* **40**, 831–854 (2016).
- 531 23. Flärdh, K. & Buttner, M. J. Streptomyces morphogenetics: dissecting differentiation in a  
532 filamentous bacterium. *Nat Rev Microbiol* **7**, 36–49 (2009).
- 533 24. de Carpentier, F., Lemaire, S. D. & Danon, A. When Unity Is Strength: The Strategies  
534 Used by Chlamydomonas to Survive Environmental Stresses. *Cells* **8**, 1307 (2019).
- 535 25. Fusco, G. & Minelli, A. Phenotypic plasticity in development and evolution: facts and  
536 concepts. *Philosophical Transactions of the Royal Society B: Biological Sciences* **365**,  
537 547–556 (2010).
- 538 26. DeWitt, T. J. & Scheiner, S. M. *Phenotypic plasticity: functional and conceptual*  
539 *approaches*. (Oxford University Press, 2003).
- 540 27. Pfennig, David W. *Phenotypic Plasticity & Evolution*. (CRC Press, 2021).
- 541 28. Lüring, M. Grazing resistance in phytoplankton. *Hydrobiologia* **848**, 237–249 (2021).
- 542 29. Yang, Z. & Kong, F. Formation of large colonies: a defense mechanism of Microcystis  
543 aeruginosa under continuous grazing pressure by flagellate Ochromonas sp. *Journal of*  
544 *Limnology* **71**, (2012).
- 545 30. Matz, C., Bergfeld, T., Rice, S. A. & Kjelleberg, S. Microcolonies, quorum sensing and  
546 cytotoxicity determine the survival of Pseudomonas aeruginosa biofilms exposed to  
547 protozoan grazing. *Environmental Microbiology* **6**, 218–226 (2004).
- 548 31. Corno, G. Effects of nutrient availability and Ochromonas sp. predation on size and  
549 composition of a simplified aquatic bacterial community. *FEMS Microbiology Ecology*  
550 **58**, 354–363 (2006).

- 551 32. Tang, S., Pichugin, Y. & Hammerschmidt, K. *Phenotypic plasticity, life cycles, and the*  
552 *evolutionary transition to multicellularity*. 2021.09.29.462355  
553 <https://www.biorxiv.org/content/10.1101/2021.09.29.462355v1> (2021)  
554 doi:10.1101/2021.09.29.462355.
- 555 33. Pigliucci, M. *Phenotypic plasticity: beyond nature and nurture*. (Johns Hopkins  
556 University Press, 2001).
- 557 34. Schwander, T. & Leimar, O. Genes as leaders and followers in evolution. *Trends Ecol*  
558 *Evol* **26**, 143–151 (2011).
- 559 35. Crispo, E. The Baldwin Effect and Genetic Assimilation: Revisiting Two Mechanisms of  
560 Evolutionary Change Mediated by Phenotypic Plasticity. *Evolution* **61**, 2469–2479  
561 (2007).
- 562 36. Waddington, C. H. Genetic Assimilation of an Acquired Character. *Evolution* **7**, 118–126  
563 (1953).
- 564 37. Nishikawa, K. & Kinjo, A. R. Mechanism of evolution by genetic assimilation. *Biophys*  
565 *Rev* **10**, 667–676 (2018).
- 566 38. Pentz, J. T. & Lind, P. A. Forecasting of phenotypic and genetic outcomes of  
567 experimental evolution in *Pseudomonas protegens*. *PLoS Genet* **17**, e1009722 (2021).
- 568 39. Rose, C. J. & Hammerschmidt, K. What Do We Mean by Multicellularity? The  
569 Evolutionary Transitions Framework Provides Answers. *Frontiers in Ecology and*  
570 *Evolution* **9**, (2021).
- 571 40. Godfrey-Smith, P. *Darwinian populations and natural selection*. (Oxford University  
572 Press, 2009).
- 573 41. Godfrey-Smith, P., Bouchard, F. & Huneman, P. Darwinian individuals. *From groups to*  
574 *individuals: evolution and emerging individuality* **16**, 17 (2013).

- 575 42. Typas, A., Banzhaf, M., Gross, C. A. & Vollmer, W. From the regulation of  
576 peptidoglycan synthesis to bacterial growth and morphology. *Nat Rev Microbiol* **10**, 123–  
577 136 (2012).
- 578 43. Bendezú, F. O. & de Boer, P. A. J. Conditional Lethality, Division Defects, Membrane  
579 Involution, and Endocytosis in mre and mrd Shape Mutants of Escherichia coli. *Journal*  
580 *of Bacteriology* **190**, 1792–1811 (2008).
- 581 44. Tamaki, S., Matsuzawa, H. & Matsushashi, M. Cluster of mrdA and mrdB genes  
582 responsible for the rod shape and mecillinam sensitivity of Escherichia coli. *J Bacteriol*  
583 **141**, 52–57 (1980).
- 584 45. Rohs, P. D. A. *et al.* A central role for PBP2 in the activation of peptidoglycan  
585 polymerization by the bacterial cell elongation machinery. *PLOS Genetics* **14**, e1007726  
586 (2018).
- 587 46. Liu, J. *et al.* Functions of the Essential Gene mraY in Cellular Morphogenesis and  
588 Development of the Filamentous Cyanobacterium Anabaena PCC 7120. *Frontiers in*  
589 *Microbiology* **12**, (2021).
- 590 47. Corno, G. & Jürgens, K. Direct and Indirect Effects of Protist Predation on Population  
591 Size Structure of a Bacterial Strain with High Phenotypic Plasticity. *Applied and*  
592 *Environmental Microbiology* **72**, 78–86 (2006).
- 593 48. Bravo, P., Ng, S. L., MacGillivray, K. A., Hammer, B. K. & Yunker, P. J. Vertical  
594 growth dynamics of biofilms. 2022.08.11.503641 Preprint at  
595 <https://doi.org/10.1101/2022.08.11.503641> (2022).
- 596 49. Libby, E. & Ratcliff, W. C. Ratcheting the evolution of multicellularity. *Science* (2014)  
597 doi:10.1126/science.1262053.

- 598 50. Nielsen, M. E. & Papaj, D. R. Why study plasticity in multiple traits? New hypotheses for  
599 how phenotypically plastic traits interact during development and selection. *Evolution* **76**,  
600 858–869 (2022).
- 601 51. Buskirk, V. & Mccollum. Functional mechanisms of an inducible defence in tadpoles:  
602 morphology and behaviour influence mortality risk from predation. *Journal of*  
603 *Evolutionary Biology* **13**, 336–347 (2000).
- 604 52. Foster, S. A. *et al.* Iterative development and the scope for plasticity: contrasts among  
605 trait categories in an adaptive radiation. *Heredity* **115**, 335–348 (2015).
- 606 53. Nielsen, M. E. & Papaj, D. R. Why Have Multiple Plastic Responses? Interactions  
607 between Color Change and Heat Avoidance Behavior in *Battus philenor* Larvae. *The*  
608 *American Naturalist* **189**, 657–666 (2017).
- 609 54. Jacobeen, S. *et al.* Cellular packing, mechanical stress and the evolution of  
610 multicellularity. *Nature Phys* **14**, 286–290 (2018).
- 611 55. Lind, P. A., Farr, A. D. & Rainey, P. B. Experimental evolution reveals hidden diversity  
612 in evolutionary pathways. *eLife* **4**, e07074 (2015).
- 613 56. Li, H. *et al.* Cost-reduction strategies in massive genomics experiments. *Mar Life Sci*  
614 *Technol* **1**, 15–21 (2019).
- 615 57. Varadi, M. *et al.* AlphaFold Protein Structure Database: massively expanding the  
616 structural coverage of protein-sequence space with high-accuracy models. *Nucleic Acids*  
617 *Research* **50**, D439–D444 (2022).
- 618 58. Pettersen, E. F. *et al.* UCSF ChimeraX: Structure visualization for researchers, educators,  
619 and developers. *Protein Sci* **30**, 70–82 (2021).

### **Author contributions**

Conceived the original idea and designed the project: Y.C.

Supervised the project: P.A.L.

Conducted the experiments and data analysis: Y.C.

Wrote the manuscript: Y.C. and P.A.L.

Acquired funding: Y.C. and P.A.L.

Refined the idea and provided key critiques: S.D.

### **Acknowledgements**

We thank Eric Libby, Jennifer Pentz, Anthony Sun, and Shraddha Karve for valuable discussions and constructive critiques. Y.C. was supported by a postdoctoral fellowship awarded by the Wenner-Gren Foundations (Sweden): Grants UPD2020-0113, UPD2021-0182. The funders had no role in study design, data collection and analysis, decision to publish, or preparation of the manuscript.

### **Data availability**

All relevant data are within the manuscript and its Supplementary Information files. The whole genome sequences reported in this study are available from the NCBI database (accession number: PRJNA880543; <https://www.ncbi.nlm.nih.gov/sra/PRJNA880543>).

### **Competing interests**

The authors declare no competing interests.
